# Supplementary material for: Molecular insight into the role of zeolite lattice constraints on methane activation over the Cu–O–Cu active site
Source: Royal Society of Chemistry journal article supplement (doi:10.1039/d1cp05371j), 2022-01-01
Supplement: d1cp05371j1.pdf [file d1cp05371j1.pdf]

*Electronic Supplementary Information*

**Molecular Insight into the Role of Zeolite Lattice Constraints  
on Methane Activation over Cu–O–Cu Active Site**

Muhammad Haris Mahyuddin,<sup>\*,a,b</sup> Adhitya Gandaryus Saputro,<sup>a,b</sup> Reza Pamungkas Putra Sukanli,<sup>a</sup> Fajar Fathurrahman,<sup>a,b</sup> Jenny Rizkiana,<sup>c</sup> Ahmad Nuruddin,<sup>a</sup> and Hermawan Kresno Dipojono<sup>a,b</sup>

<sup>a</sup> Research Group of Advanced Functional Materials, Faculty of Industrial Technology, Institut Teknologi Bandung, Bandung 40132, Indonesia

<sup>b</sup> Research Center for Nanoscience and Nanotechnology, Institut Teknologi Bandung, Bandung 40132, Indonesia

<sup>c</sup> Department of Chemical Engineering, Faculty of Industrial Technology, Institut Teknologi Bandung, Ganesha 10, Bandung 40132, Indonesia

\* To whom all correspondences should be addressed

(e-mail: haris[at]tf.itb.ac.id).

## Table of Contents:

- Fig. S1** Small cluster model of  $[\text{Cu}_2(\mu\text{-O})]^{2+}$ -MOR.
- Fig. S2** Plots of H-CH<sub>3</sub> activation barrier against  $\angle\text{CuOCu}$  and  $\varphi$  angles.
- Table S1** Geometrical parameters along the CH<sub>4</sub> activation in the 12-MR opening.
- Fig. S3** Plot of relative  $E_{\text{sta}}$  against relative  $\Delta E$ .
- Fig. S4** Optimized structures of **AS**, **TS**, and **FS** for the CH<sub>4</sub> activation inside the 8-MR side pocket.
- Table S2** Geometrical parameters along the CH<sub>4</sub> activation in the 8-MR side pocket.
- Table S3** Energetic results for the CH<sub>4</sub> activation in the 12-MR opening and inside the 8-MR side pocket calculated using GGA-PBE functional

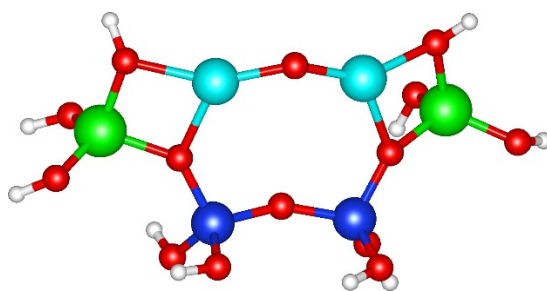

**Fig. S1** Small cluster model of  $[\text{Cu}_2(\mu\text{-O})]^{2+}\text{-MOR}$  for the molecular orbital calculations. Color legend: Si (blue), Al (green), Cu (cyan), O (red), H (white).

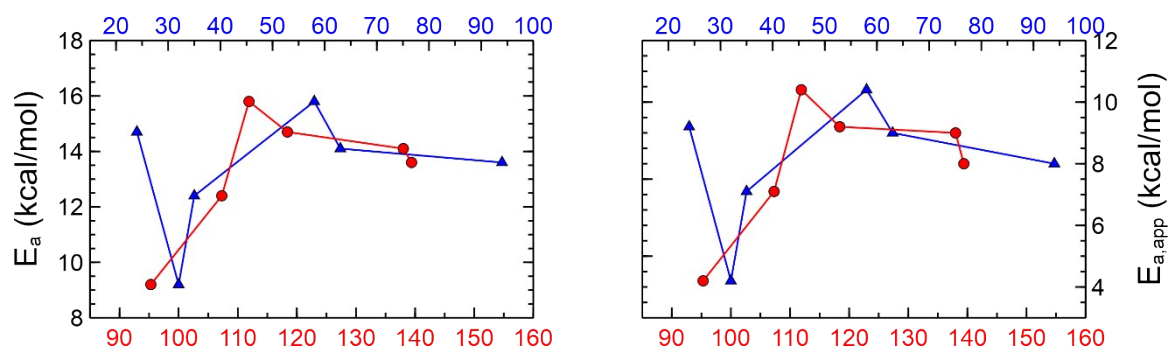

**Fig. S2** Plots of H-CH<sub>3</sub> (a) activation barrier and (b) apparent activation barrier against the  $\angle\text{CuOCu}$  and  $\varphi$  angles.

**Table S1.** Geometrical parameters, imaginary frequency ( $i\nu$ ), and atomic spin densities ( $\rho$ ) along the H<sub>3</sub>C-H activation in the 12-MR opening. All reaction steps are in the triplet state.

| Al-pair<br>arr.      | React.<br>step | $i\nu$<br>(cm <sup>-1</sup> ) | d(Al...Al)<br>(Å) | d(Cu...Cu)<br>(Å) | d(Cu-O)<br>(Å) | ∠CuOCu<br>(°) | $\varphi$ (°) | d(C-H)<br>(Å) | d(O-H)<br>(Å) | $\rho$ (Cu1,<br>Cu2) | $\rho$ (O, C) | $\rho$ (H) |
|----------------------|----------------|-------------------------------|-------------------|-------------------|----------------|---------------|---------------|---------------|---------------|----------------------|---------------|------------|
| T2/T4 <sub>1Si</sub> | AS             |                               | 6.07              | 3.04              | 1.75, 1.77     | 119.7         | 19/23         | 1.10          | 2.48          | 0.64, 0.57           | 0.50, 0.00    | 0.001      |
|                      | TS             | 1296.7                        | 6.02              | 2.97              | 1.81, 1.82     | 110.2         | 25/28         | 1.32          | 1.24          | 0.45, 0.35           | 0.52, 0.46    | 0.033      |
|                      | FS             |                               | 6.03              | 3.00              | 1.84, 1.84     | 109.6         | 26/28         | 1.95          | 1.00          | 0.42, 0.32           | 0.19, 0.87    | 0.036      |
| T2 <sub>2Si</sub>    | AS             |                               | 7.68              | 2.61              | 1.76, 1.76     | 96.0          | 30/30         | 1.10          | 2.34          | 0.56, 0.56           | 0.62, 0.00    | 0.001      |
|                      | TS             | 1117.7                        | 7.56              | 2.45              | 1.82, 1.82     | 84.5          | 27/27         | 1.30          | 1.26          | 0.39, 0.39           | 0.54, 0.45    | 0.030      |
|                      | FS             |                               | 7.57              | 2.46              | 1.84, 1.84     | 83.9          | 25/25         | 2.01          | 1.00          | 0.37, 0.37           | 0.17, 0.86    | 0.037      |
| T4 <sub>2Si</sub>    | AS             |                               | 7.75              | 3.30              | 1.77, 1.75     | 139.8         | 49/63         | 1.10          | 2.42          | 0.58, 0.63           | 0.52, 0.00    | 0.001      |
|                      | TS             | 1410.1                        | 7.64              | 3.28              | 1.82, 1.82     | 128.1         | 51/66         | 1.33          | 1.23          | 0.39, 0.40           | 0.53, 0.48    | 0.029      |
|                      | FS             |                               | 7.69              | 3.32              | 1.85, 1.85     | 128.0         | 52/64         | 2.01          | 1.00          | 0.36, 0.36           | 0.20, 0.87    | 0.034      |
| T2/T4 <sub>2Si</sub> | AS             |                               | 7.68              | 2.85              | 1.76, 1.76     | 108.5         | 27/35         | 1.10          | 2.36          | 0.62, 0.60           | 0.53, 0.00    | 0.000      |
|                      | TS             | 1187.2                        | 7.55              | 2.56              | 1.82, 1.83     | 88.7          | 25/31         | 1.30          | 1.26          | 0.42, 0.38           | 0.53, 0.44    | 0.032      |
|                      | FS             |                               | 7.58              | 2.57              | 1.84, 1.85     | 88.3          | 22/28         | 1.96          | 1.00          | 0.39, 0.36           | 0.18, 0.86    | 0.035      |
| T2 <sub>3Si</sub>    | AS             |                               | 8.23              | 2.92              | 1.75, 1.75     | 113.6         | 53/58         | 1.10          | 2.34          | 0.61, 0.58           | 0.54, 0.00    | 0.000      |
|                      | TS             | 1398.9                        | 8.08              | 2.77              | 1.80, 1.81     | 100.1         | 43/43         | 1.33          | 1.23          | 0.42, 0.40           | 0.46, 0.47    | 0.035      |
|                      | FS             |                               | 8.12              | 2.82              | 1.82, 1.83     | 101.2         | 41/42         | 1.96          | 1.00          | 0.38, 0.37           | 0.16, 0.86    | 0.036      |
| T4 <sub>3Si</sub>    | AS             |                               | 8.34              | 3.30              | 1.77, 1.76     | 138.5         | 88/94         | 1.10          | 2.51          | 0.57, 0.61           | 0.57, 0.00    | 0.001      |
|                      | TS             | 1495.2                        | 8.29              | 3.35              | 1.83, 1.83     | 133.1         | 85/92         | 1.34          | 1.23          | 0.40, 0.40           | 0.51, 0.48    | 0.032      |
|                      | FS             |                               | 8.35              | 3.42              | 1.85, 1.85     | 134.9         | 86/91         | 2.01          | 1.00          | 0.36, 0.36           | 0.21, 0.87    | 0.033      |

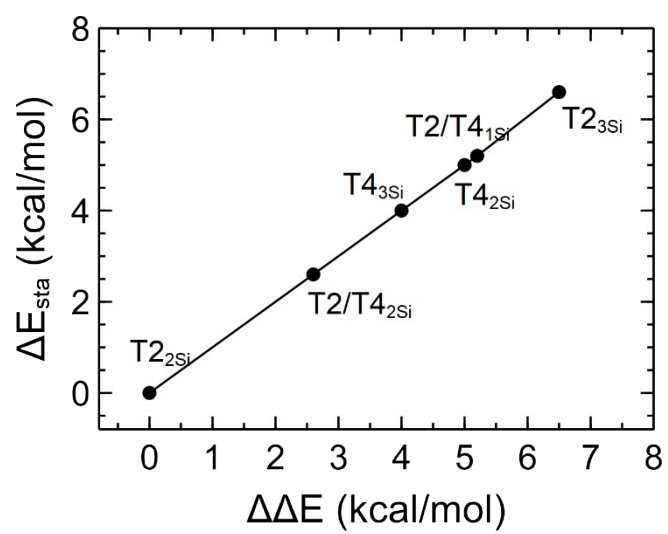

**Fig. S3** Plot of  $E_{sta}$  relative to that for T2<sub>2Si</sub> against  $\Delta E$  relative to that for T2<sub>2Si</sub>.

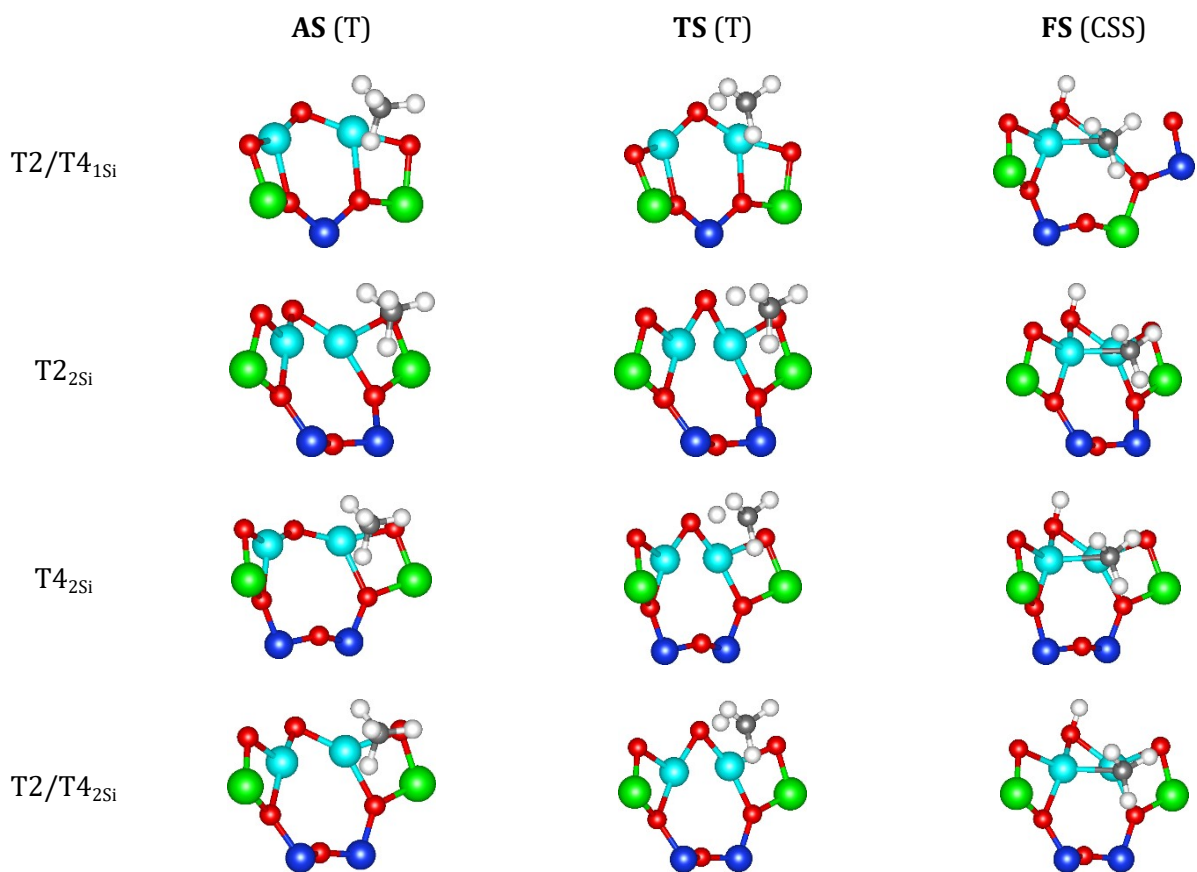

**Fig. S4** Optimized structures of **AS**, **TS**, and **FS** for the CH<sub>4</sub> activation inside the 8-MR side pocket. T and CSS stand for the triplet and closed-shell singlet states, respectively.

**Table S2.** Geometrical parameters, imaginary frequency ( $i\nu$ ), and atomic spin densities ( $\rho$ ) along the H<sub>3</sub>C–H activation inside the 8-MR side pocket.

| Al-pair<br>arr.          | Reaction<br>step (spin<br>state) <sup>a</sup> | $i\nu$<br>(cm <sup>-1</sup> ) | d(Al...Al<br>)<br>(Å) | d(Cu...Cu)<br>(Å) | d(Cu–O)<br>(Å) | ∠CuOCu<br>(°) | $\varphi$ (°) | d(C–H)<br>(Å) | d(O–H)<br>(Å) | $\rho$ (Cu1,<br>Cu2) | $\rho$ (O, C) | $\rho$ (H) |
|--------------------------|-----------------------------------------------|-------------------------------|-----------------------|-------------------|----------------|---------------|---------------|---------------|---------------|----------------------|---------------|------------|
| T2/T4 <sub>1S</sub><br>i | AS (T)                                        |                               | 6.07                  | 3.04              | 1.75, 1.77     | 119.7         | 19/23         | 1.10          | 2.97          | 0.64, 0.57           | 0.50, 0.00    | 0.001      |
|                          | TS (T)                                        | 1591.6                        | 6.06                  | 3.05              | 1.80, 1.83     | 114.4         | 3/4           | 1.38          | 1.22          | 0.42, 0.37           | 0.51, 0.49    | 0.029      |
|                          | FS (CSS)                                      |                               | 5.96                  | 2.40              | 1.84, 1.86     | 81.0          | 68/78         | -             | 0.99          | 0.00, 0.00           | 0.00, 0.00    | 0.000      |
| T2 <sub>2Si</sub>        | AS (T)                                        |                               | 7.68                  | 2.61              | 1.76, 1.76     | 96.0          | 30/30         | 1.10          | 2.98          | 0.56, 0.56           | 0.62, 0.00    | 0.001      |
|                          | TS (T)                                        | 1412.7                        | 7.64                  | 2.46              | 1.82, 1.82     | 84.9          | 7/7           | 1.34          | 1.25          | 0.38, 0.38           | 0.57, 0.46    | 0.023      |
|                          | FS (CSS)                                      |                               | 7.62                  | 2.36              | 1.88, 1.88     | 78.1          | 84/84         | -             | 0.99          | 0.00, 0.00           | 0.00, 0.00    | 0.000      |
| T4 <sub>2Si</sub>        | AS (T)                                        |                               | 7.75                  | 3.30              | 1.77, 1.75     | 139.8         | 49/63         | 1.10          | 2.93          | 0.58, 0.63           | 0.52, 0.00    | 0.001      |
|                          | TS (T)                                        | 1209.5                        | 7.65                  | 2.69              | 1.81, 1.81     | 95.7          | 9/15          | 1.31          | 1.26          | 0.41, 0.40           | 0.53, 0.44    | 0.033      |
|                          | FS (CSS)                                      |                               | 7.62                  | 2.42              | 1.86, 1.86     | 81.2          | 75/82         | -             | 0.99          | 0.00, 0.00           | 0.00, 0.00    | 0.000      |
| T2/T4 <sub>2S</sub><br>i | AS (T)                                        |                               | 7.68                  | 2.85              | 1.76, 1.76     | 108.5         | 27/35         | 1.10          | 3.28          | 0.62, 0.60           | 0.53, 0.00    | 0.000      |
|                          | TS (T)                                        | 1250.0                        | 7.61                  | 2.50              | 1.80, 1.82     | 87.0          | 6/7           | 1.32          | 1.24          | 0.38, 0.38           | 0.55, 0.46    | 0.033      |
|                          | FS (CSS)                                      |                               | 7.68                  | 2.40              | 1.84, 1.90     | 79.8          | 82/85         | -             | 0.99          | 0.00, 0.00           | 0.00, 0.00    | 0.000      |

<sup>a</sup> T and CSS stand for the triplet and closed-shell singlet states, respectively.

**Table S3.** Energetic results for the CH<sub>4</sub> activation in the 12-MR opening and inside the 8-MR side pocket calculated using GGA-PBE functional.

| Al-pair<br>arrangement | $E_{\text{rel}}$ (kcal/mol) |      | $E_{\text{ads}}$ (kcal/mol) |       | $E_{\text{a}}$ (kcal/mol) |      | $E_{\text{a,app}}$ (kcal/mol) |      | $\Delta E$ (kcal/mol) |       |
|------------------------|-----------------------------|------|-----------------------------|-------|---------------------------|------|-------------------------------|------|-----------------------|-------|
|                        | 12-MR                       | 8-MR | 12-MR                       | 8-MR  | 12-MR                     | 8-MR | 12-MR                         | 8-MR | 12-MR                 | 8-MR  |
| T2/T4 <sub>1Si</sub>   | 10.0                        | 10.0 | -6.3                        | -11.6 | 12.9                      | 25.6 | 6.6                           | 14.0 | 4.0                   | -24.5 |
| T2 <sub>2Si</sub>      | 0.0                         | 0.0  | -5.3                        | -11.2 | 11.2                      | 19.6 | 5.8                           | 8.4  | 2.2                   | -21.0 |
| T4 <sub>2Si</sub>      | 4.9                         | 4.9  | -5.5                        | -11.4 | 13.6                      | 24.6 | 8.0                           | 13.2 | 4.8                   | -21.9 |
| T2/T4 <sub>2Si</sub>   | 5.9                         | 5.9  | -5.5                        | -11.2 | 12.1                      | 21.2 | 6.6                           | 10.0 | 3.3                   | -22.4 |
| T2 <sub>3Si</sub>      | 3.0                         | 3.0  | -4.9                        | -     | 15.1                      | -    | 10.2                          | -    | 7.4                   | -     |
| T4 <sub>3Si</sub>      | 4.9                         | 4.9  | -5.5                        | -     | 14.1                      | -    | 8.6                           | -    | 5.5                   | -     |

Comparing the results calculated with the PBE functional to the results calculated with the PBE+U method, we found no significant changes in the energetic trend.
